# Supplementary material for: Controllable white upconversion luminescence in Ho3+/Tm3+/Yb3+ co-doped CaMoO4
Source: Royal Society of Chemistry journal article supplement (doi:10.1039/c2jm15332g), 2012-01-01
Supplement: c2jm15332g.pdf [file c2jm15332g.pdf]

Journal of Materials Chemistry

Supporting Information of

**Controllable White Upconversion luminescence in  
 $\text{Ho}^{3+}/\text{Tm}^{3+}/\text{Yb}^{3+}$  co-doped  $\text{CaMoO}_4$**

**Particle morphology and size distribution of  $\text{Ho}^{3+}/\text{Tm}^{3+}/\text{Yb}^{3+}$  co-doped  $\text{CaMoO}_4$  crystal**

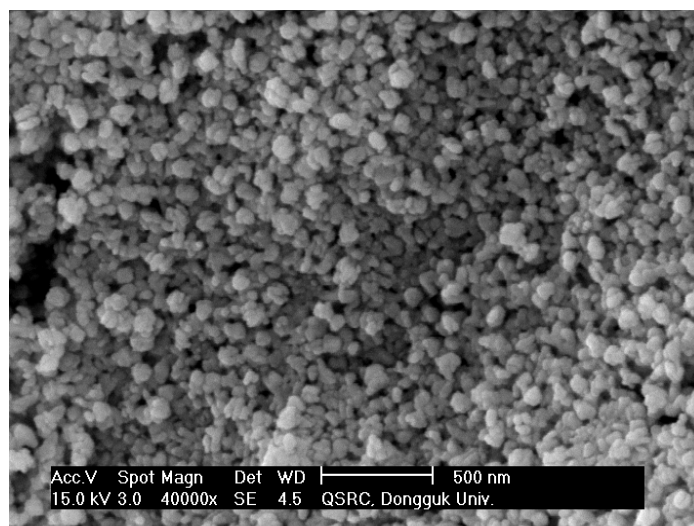

**Fig.S1. SEM image of  $\text{CaMoO}_4:0.5\% \text{Ho}^{3+}/0.5\% \text{Tm}^{3+}$  sample prepared at 600 °C**

Figure S1 shows FE-SEM of  $\text{CaMoO}_4$  UC phosphor sample doped with 0.5 %  $\text{Ho}^{3+}$ , 0.5 %  $\text{Tm}^{3+}$  and 16 %  $\text{Yb}^{3+}$  prepared at 600 °C for 3 hrs. The sample shows spherical and uniform particles with size less than 100 nm. Other  $\text{CaMoO}_4$  UC phosphor samples doped with different doping concentrations represented similar particle morphology and size distribution.
